# Supplementary material for: Negative control exposure studies in the presence of measurement error: implications for attempted effect estimate calibration
Source: PubMed Central journal article supplement (PMC5913619; doi:10.1093/ije/dyx213), 2017-10-27
Supplement: dyx213_supp.pdf [file dyx213_supp.pdf]

## Appendix 1

In matrix form the true model considered can be written as;

$$\mathbf{y} = \mathbf{X}_T \boldsymbol{\beta} + \mathbf{U}\gamma + \boldsymbol{\epsilon}$$

The measurement error can be defined as;

$$\mathbf{X}_O = \mathbf{X}_T + \mathbf{V}$$

Where the variables and error terms are defined as given in the body of the paper.

In matrix form the regression estimated can be written as;

$$\mathbf{y} = \mathbf{X}'_O \boldsymbol{\beta} + \mathbf{u}$$

The OLS estimator for  $\boldsymbol{\beta}$  is given by;

$$\begin{aligned} \widehat{\boldsymbol{\beta}}_{OLS} &= (\mathbf{X}'_O \mathbf{X}_O)^{-1} (\mathbf{X}'_O \mathbf{y}) \\ &= (\mathbf{X}'_O \mathbf{X}_O)^{-1} (\mathbf{X}'_O (\mathbf{X}_O \boldsymbol{\beta} + \mathbf{U}\gamma - \mathbf{V}\boldsymbol{\beta} + \boldsymbol{\epsilon})) \\ &= \boldsymbol{\beta} + (\mathbf{X}'_O \mathbf{X}_O)^{-1} (\mathbf{X}'_O \mathbf{U}\gamma) - (\mathbf{X}'_O \mathbf{X}_O)^{-1} (\mathbf{X}'_O \mathbf{V}\boldsymbol{\beta}) + (\mathbf{X}'_O \mathbf{X}_O)^{-1} (\mathbf{X}'_O \boldsymbol{\epsilon}) \end{aligned}$$

Therefore the bias of  $\widehat{\boldsymbol{\beta}}_{OLS}$  is given by;

$$E(\widehat{\boldsymbol{\beta}}_{OLS}) - \boldsymbol{\beta} = (\mathbf{X}'_O \mathbf{X}_O)^{-1} (\mathbf{X}'_O \mathbf{U}\gamma) - (\mathbf{X}'_O \mathbf{X}_O)^{-1} (\mathbf{X}'_O \mathbf{V}\boldsymbol{\beta}) + (\mathbf{X}'_O \mathbf{X}_O)^{-1} (\mathbf{X}'_O \boldsymbol{\epsilon})$$

The asymptotic distribution of this bias can be found by taking the probability limit of this expression;

$$\begin{aligned} plim \frac{1}{n} (\mathbf{X}'_O \mathbf{X}_O) &= plim \frac{1}{n} (\mathbf{X}'_T \mathbf{X}_T + 2\mathbf{X}'_T \mathbf{V} + \mathbf{V}'\mathbf{V}) = \mathbf{Q}_{XX} + 2\boldsymbol{\Sigma}_{XV} + \boldsymbol{\Sigma}_V plim \frac{1}{n} (\mathbf{X}'_O \mathbf{U}) \\ &= plim \frac{1}{n} (\mathbf{X}'_T \mathbf{U} + \mathbf{V}'\mathbf{U}) = \mathbf{Q}_{XU} + 0 \end{aligned}$$

$$plim \frac{1}{n} (\mathbf{X}'_O \mathbf{V}) = plim \frac{1}{n} (\mathbf{X}'_T \mathbf{V} + \mathbf{V}'\mathbf{V}) = \boldsymbol{\Sigma}_{XV} + \boldsymbol{\Sigma}_V$$

$$plim \frac{1}{n} (\mathbf{X}'_O \boldsymbol{\epsilon}) = plim \frac{1}{n} (\mathbf{X}'_T \boldsymbol{\epsilon} + \mathbf{V}'\boldsymbol{\epsilon}) = 0 + 0$$

Therefore the bias of the OLS estimator of  $\boldsymbol{\beta}$  is;

$$E(\widehat{\boldsymbol{\beta}}_{OLS}) - \boldsymbol{\beta} \xrightarrow{d} (\mathbf{Q}_{XX} + 2\boldsymbol{\Sigma}_{XV} + \boldsymbol{\Sigma}_V)^{-1} \mathbf{Q}_{XU}\gamma - (\mathbf{Q}_{XX} + 2\boldsymbol{\Sigma}_{XV} + \boldsymbol{\Sigma}_V)^{-1} (\boldsymbol{\Sigma}_{XV} + \boldsymbol{\Sigma}_V)\boldsymbol{\beta}$$

$$\begin{aligned}
& +(\mathbf{Q}_{XX} + 2\mathbf{\Sigma}_{XV} + \mathbf{\Sigma}_V)^{-1}(0) \\
= & (\mathbf{Q}_{XX} + 2\mathbf{\Sigma}_{XV} + \mathbf{\Sigma}_V)^{-1}\mathbf{Q}_{XU}\gamma - (\mathbf{Q}_{XX} + 2\mathbf{\Sigma}_{XV} + \mathbf{\Sigma}_V)^{-1}(\mathbf{\Sigma}_{XV} + \mathbf{\Sigma}_V)\boldsymbol{\beta}
\end{aligned}$$

As we have assumed no correlation between the true values of the exposure and control and the error terms in the model this can be simplified to;

$$E(\widehat{\boldsymbol{\beta}}_{OLS}) - \boldsymbol{\beta} = (\mathbf{Q}_{XX} + \mathbf{\Sigma}_V)^{-1}\mathbf{Q}_{XU}\gamma - (\mathbf{Q}_{XX} + \mathbf{\Sigma}_V)^{-1}\mathbf{\Sigma}_V\boldsymbol{\beta}.$$
